# Supplementary material for: Application of Artificial Neural Networks for Dengue Fever Outbreak Predictions in the Northwest Coast of Yucatan, Mexico and San Juan, Puerto Rico
Source: PubMed Central journal article supplement (PMC6136605; doi:10.3390/tropicalmed3010005), 2018-01-05
Supplement: tropicalmed-03-00005-s001.pdf [file tropicalmed-03-00005-s001.pdf]

# Application of Artificial Neural Networks for Dengue Fever Outbreak Predictions in the Northwest Coast of Yucatan, Mexico and San Juan, Puerto Rico

Abdiel E. Laureano-Rosario, Andrew P. Duncan, Pablo A. Mendez-Lazaro, Julian E. Garcia-Rejon, Salvador Gomez-Carro, Jose Farfan-Ale, Dragan A. Savic and Frank E. Muller-Karger

Table S1. Mexico multiple linear regression model for population younger than 24 years old. Bold values are significant with 95% certainty ( $\alpha = 0.05$ ). Parametric and non-parametric p-values are included. Power of these models ( $r^2$ ) are shown above the table.

| Mexico younger than 24 years ( $r^2 = 0.85$ ) |         |        |                    |                        |
|-----------------------------------------------|---------|--------|--------------------|------------------------|
| Variable                                      | b       | t-stat | Parametric p-value | Non-parametric p-value |
| Date                                          | -327.54 | -1.39  | 0.166              | 0.102                  |
| Humidity                                      | 1.02    | 3.01   | <b>0.003</b>       | <b>0.002</b>           |
| SST                                           | 1.11    | 1.51   | 0.132              | 0.114                  |
| Precipitation 1-week lag                      | 0.07    | 3.55   | <b>0.000</b>       | <b>0.002</b>           |
| Population                                    | -30.08  | -1.75  | 0.081              | <b>0.018</b>           |
| Minimum air temperature                       | 1.16    | 3.67   | <b>0.000</b>       | <b>0.002</b>           |
| Previous dengue cases                         | 5.46    | 24.97  | <b>0.000</b>       | <b>0.002</b>           |

Table S2. Mexico multiple linear regression model for population younger than 5 and older than 65 years old. Bold values are significant with 95% certainty ( $\alpha = 0.05$ ). Parametric and non-parametric p-values are included. Power of these models ( $r^2$ ) are shown above the table.

| Mexico younger than 5 and older than 65 years ( $r^2 = 0.84$ ) |        |        |                    |                        |
|----------------------------------------------------------------|--------|--------|--------------------|------------------------|
| Variable                                                       | b      | t-stat | Parametric p-value | Non-parametric p-value |
| Date                                                           | -79.89 | -0.43  | 0.668              | 0.654                  |
| Humidity                                                       | 0.44   | 1.64   | 0.103              | 0.220                  |
| SST                                                            | 0.19   | 0.33   | 0.743              | 0.612                  |
| Precipitation 1-week lag                                       | 0.04   | 2.97   | <b>0.003</b>       | <b>0.040</b>           |
| Population                                                     | -11.35 | -0.84  | 0.404              | 0.364                  |
| Minimum air temperature                                        | 0.58   | 2.33   | <b>0.021</b>       | <b>0.038</b>           |
| Previous dengue cases                                          | 10.37  | 26.36  | <b>0.000</b>       | <b>0.002</b>           |

Table S3. Puerto Rico multiple linear regression model for population younger than 24 years old. Bold values are significant with 95% certainty ( $\alpha = 0.05$ ). Parametric and non-parametric p-values are included. Power of these models ( $r^2$ ) are shown above the table.

| Puerto Rico younger than 24 years ( $r^2 = 0.74$ ) |       |        |                    |                        |
|----------------------------------------------------|-------|--------|--------------------|------------------------|
| Variable                                           | b     | t-stat | Parametric p-value | Non-parametric p-value |
| Date                                               | -3.62 | -2.95  | <b>0.003</b>       | <b>0.002</b>           |
| SST                                                | 0.07  | 1.92   | 0.055              | <b>0.046</b>           |
| Precipitation                                      | 0.00  | -1.13  | 0.258              | 0.282                  |
| Population                                         | -0.19 | -6.34  | <b>0.000</b>       | <b>0.002</b>           |
| Minimum air temperature                            | 0.03  | 0.84   | 0.400              | 0.370                  |
| Maximum air temperature                            | -0.03 | -0.80  | 0.425              | 0.394                  |
| Previous dengue cases                              | 0.05  | 41.94  | <b>0.000</b>       | <b>0.002</b>           |

Table S4. Puerto Rico multiple linear regression model for population younger than 5 and older than 65 years old. Bold values are significant with 95% certainty ( $\alpha = 0.05$ ). Parametric and non-parametric p-values are included. Power of these models ( $r^2$ ) are shown above the table.

| Puerto Rico younger than 5 and older than 65 years ( $r^2 = 0.33$ ) |        |        |                    |                        |
|---------------------------------------------------------------------|--------|--------|--------------------|------------------------|
| Variable                                                            | b      | t-stat | Parametric p-value | Non-parametric p-value |
| Date                                                                | -42.24 | -2.21  | <b>0.027</b>       | <b>0.030</b>           |
| SST                                                                 | 0.05   | 0.09   | 0.928              | 0.976                  |
| Precipitation                                                       | 0.01   | 0.42   | 0.678              | 0.654                  |
| Population                                                          | -1.60  | -3.37  | <b>0.001</b>       | <b>0.002</b>           |
| Minimum air temperature                                             | 1.70   | 2.88   | <b>0.004</b>       | <b>0.012</b>           |
| Maximum air temperature                                             | -0.19  | -0.31  | 0.756              | 0.810                  |
| Previous dengue cases                                               | 0.38   | 16.04  | <b>0.000</b>       | <b>0.002</b>           |
